# Supplementary material for: Synergistically assembled graphene/ZnO composite to enhance anticorrosion performance of waterborne epoxy coatings
Source: Royal Society of Chemistry journal article supplement (doi:10.1039/d2ra00959e), 2022-01-01
Supplement: d2ra00959e1.pdf [file d2ra00959e1.pdf]

Table S1. The value of corrosion potential, corrosion current and corrosion inhibition rate for Gr<sub>0</sub>-ZnO<sub>0</sub>, Gr<sub>0.04</sub>-ZnO<sub>0</sub>, Gr<sub>0.02</sub>-ZnO<sub>0.4</sub>, Gr<sub>0.04</sub>-ZnO<sub>0.4</sub> and Gr<sub>0.06</sub>-ZnO<sub>0.4</sub> coatings in Tafel image.

| Samples                                | E <sub>corr</sub> /mV | i <sub>corr</sub> /A cm <sup>-2</sup> | η/%   |
|----------------------------------------|-----------------------|---------------------------------------|-------|
| Gr <sub>0</sub> -ZnO <sub>0</sub>      | -631.36               | 9.40 × 10 <sup>-6</sup>               | —     |
| Gr <sub>0.04</sub> -ZnO <sub>0</sub>   | -610.04               | 4.49 × 10 <sup>-6</sup>               | 52.23 |
| Gr <sub>0.02</sub> -ZnO <sub>0.4</sub> | -599.13               | 5.67 × 10 <sup>-7</sup>               | 93.97 |
| Gr <sub>0.04</sub> -ZnO <sub>0.4</sub> | -527.80               | 4.15 × 10 <sup>-8</sup>               | 99.56 |
| Gr <sub>0.06</sub> -ZnO <sub>0.4</sub> | -560.74               | 8.89 × 10 <sup>-7</sup>               | 90.54 |

Table S2. The value of corrosion potential, corrosion current and corrosion inhibition rate of for Gr<sub>0.04</sub>-ZnO<sub>0</sub>, Gr<sub>0.04</sub>-ZnO<sub>0.1</sub>, Gr<sub>0.04</sub>-ZnO<sub>0.4</sub> and Gr<sub>0.04</sub>-ZnO<sub>1</sub> coatings in Tafel image.

| Samples                                | E <sub>corr</sub> /V | i <sub>corr</sub> /A cm <sup>-2</sup> | η/%   |
|----------------------------------------|----------------------|---------------------------------------|-------|
| Gr <sub>0.04</sub> -ZnO <sub>0</sub>   | -610.04              | 4.49 × 10 <sup>-6</sup>               | 52.23 |
| Gr <sub>0.04</sub> -ZnO <sub>0.1</sub> | -561.78              | 4.07 × 10 <sup>-7</sup>               | 95.67 |
| Gr <sub>0.04</sub> -ZnO <sub>0.4</sub> | -527.80              | 4.15 × 10 <sup>-8</sup>               | 99.56 |
| Gr <sub>0.04</sub> -ZnO <sub>1</sub>   | -547.32              | 3.52 × 10 <sup>-7</sup>               | 96.25 |

Table S3. Electrochemical parameters extracted from EIS experiment for Gr<sub>0</sub>-ZnO<sub>0</sub>, Gr<sub>0.04</sub>-ZnO<sub>0</sub>, Gr<sub>0.02</sub>-ZnO<sub>0.4</sub>, Gr<sub>0.04</sub>-ZnO<sub>0.4</sub> and Gr<sub>0.06</sub>-ZnO<sub>0.4</sub> coatings immersed in a 3.5wt% NaCl aqueous solution.

| Samples                           | R <sub>s</sub><br>(Ω cm <sup>2</sup> ) | C<br>(Ω <sup>-1</sup> cm <sup>-2</sup> sn) | R <sub>p</sub><br>(Ω cm <sup>2</sup> ) | Y <sub>0</sub><br>(Ω <sup>-1</sup> cm <sup>-2</sup> sn) | n    |
|-----------------------------------|----------------------------------------|--------------------------------------------|----------------------------------------|---------------------------------------------------------|------|
| Gr <sub>0</sub> -ZnO <sub>0</sub> | 249.1                                  | 5.64 × 10 <sup>-7</sup>                    | 6186                                   | 8.95 × 10 <sup>-4</sup>                                 | 0.56 |

|                                        |       |                       |        |                       |      |
|----------------------------------------|-------|-----------------------|--------|-----------------------|------|
| Gr <sub>0.04</sub> -ZnO <sub>0</sub>   | 344.1 | $6.3 \times 10^{-7}$  | 19560  | $1.07 \times 10^{-5}$ | 0.51 |
| Gr <sub>0.02</sub> -ZnO <sub>0.4</sub> | 211.1 | $8.50 \times 10^{-6}$ | 42096  | $1.15 \times 10^{-5}$ | 0.73 |
| Gr <sub>0.04</sub> -ZnO <sub>0.4</sub> | 494.4 | $9.56 \times 10^{-5}$ | 200530 | $9.19 \times 10^{-7}$ | 0.76 |
| Gr <sub>0.06</sub> -ZnO <sub>0.4</sub> | 284.3 | $1.22 \times 10^{-6}$ | 56695  | $3.15 \times 10^{-6}$ | 0.66 |

Table S4. Electrochemical parameters extracted from EIS experiment for Gr<sub>0.04</sub>-ZnO<sub>0</sub>, Gr<sub>0.04</sub>-ZnO<sub>0.1</sub>, Gr<sub>0.04</sub>-ZnO<sub>0.4</sub> and Gr<sub>0.04</sub>-ZnO<sub>1</sub> electrode immersed in a 3.5wt% NaCl aqueous solution.

| <b>Samples</b>                         | R <sub>s</sub><br>( $\Omega \text{ cm}^2$ ) | C                     | R <sub>p</sub><br>( $\Omega \text{ cm}^2$ ) | Y <sub>0</sub><br>( $\Omega^{-1} \text{ cm}^{-2} \text{ sn}$ ) | n    |
|----------------------------------------|---------------------------------------------|-----------------------|---------------------------------------------|----------------------------------------------------------------|------|
| Gr <sub>0.04</sub> -ZnO <sub>0</sub>   | 344.1                                       | $6.3 \times 10^{-7}$  | 19560                                       | $1.07 \times 10^{-5}$                                          | 0.51 |
| Gr <sub>0.04</sub> -ZnO <sub>0.1</sub> | 503.3                                       | $5.06 \times 10^{-7}$ | 20018                                       | $4.21 \times 10^{-6}$                                          | 0.57 |
| Gr <sub>0.04</sub> -ZnO <sub>0.4</sub> | 494.4                                       | $9.56 \times 10^{-5}$ | 200530                                      | $9.19 \times 10^{-7}$                                          | 0.76 |
| Gr <sub>0.04</sub> -ZnO <sub>1</sub>   | 333.2                                       | $4.17 \times 10^{-6}$ | 44914                                       | $8.14 \times 10^{-6}$                                          | 0.64 |

Table S5. Anticorrosion properties of graphene derivatives reinforced WEP.

| <b>Samples</b>                         | Filler content<br>(wt%) | Immersion<br>duration in 3.5%<br>NaCl (days) | Coating<br>thickness<br>( $\mu\text{m}$ ) | R <sub>p</sub><br>( $\Omega \text{ cm}^2$ ) | CPE <sub>c</sub> (F)  | Reference    |
|----------------------------------------|-------------------------|----------------------------------------------|-------------------------------------------|---------------------------------------------|-----------------------|--------------|
| Gr <sub>0.04</sub> -ZnO <sub>0.4</sub> | 0.44                    | 7                                            | $25 \pm 2$                                | $2 \times 10^5$                             | $9.56 \times 10^{-5}$ | This<br>Work |
| PGHEP-G                                | 0.5                     | 5                                            | $25 \pm 0.5$                              | $2.5 \times 10^4$                           | unknown               | 31           |
| G-CAT <sup>-</sup>                     | 0.5                     | 4                                            | $20 \pm 2$                                | $2.72 \times 10^4$                          | $5.71 \times 10^{-7}$ | 32           |
| Sodium<br>polyacrylate<br>graphene     | 0.5                     | 2                                            | $50 \pm 2$                                | $1.14 \times 10^5$                          | $1.5 \times 10^{-8}$  | 33           |

|                           |     |   |            |                   |                       |    |
|---------------------------|-----|---|------------|-------------------|-----------------------|----|
| lignin-<br>OH/graphene    | 0.5 | 2 | $50 \pm 5$ | $2.8 \times 10^4$ | $7.6 \times 10^{-10}$ | 34 |
| graphene/epoxy<br>(GEP06) | 0.6 | 3 | $20 \pm 2$ | 29.07             | unknown               | 22 |

Table S6. The compositions of the investigated samples.

| <b>Samples</b>                         | graphene<br>(wt%) | ZnO<br>(wt%) | Defoamer<br>(wt%) | Waterborne<br>epoxy dispersion<br>(wt%) | Polyamide<br>(wt%) |
|----------------------------------------|-------------------|--------------|-------------------|-----------------------------------------|--------------------|
| Gr <sub>0</sub> -ZnO <sub>0</sub>      | 0                 | 0            | 1.1               | 66.7                                    | 32.2               |
| Gr <sub>0.02</sub> -ZnO <sub>0.4</sub> | 0.02              | 0.4          | 1.1               | 66.7                                    | 31.78              |
| Gr <sub>0.04</sub> -ZnO <sub>0.4</sub> | 0.04              | 0.4          | 1.1               | 66.7                                    | 31.76              |
| Gr <sub>0.06</sub> -ZnO <sub>0.4</sub> | 0.06              | 0.4          | 1.1               | 66.7                                    | 31.74              |
| Gr <sub>0.04</sub> -ZnO <sub>0</sub>   | 0.04              | 0            | 1.1               | 66.7                                    | 32.16              |
| Gr <sub>0.04</sub> -ZnO <sub>0.1</sub> | 0.04              | 0.1          | 1.1               | 66.7                                    | 32.06              |
| Gr <sub>0.04</sub> -ZnO <sub>0.4</sub> | 0.04              | 0.4          | 1.1               | 66.7                                    | 32.06              |
| Gr <sub>0.04</sub> -ZnO <sub>1</sub>   | 0.04              | 1            | 1.1               | 66.7                                    | 31.16              |

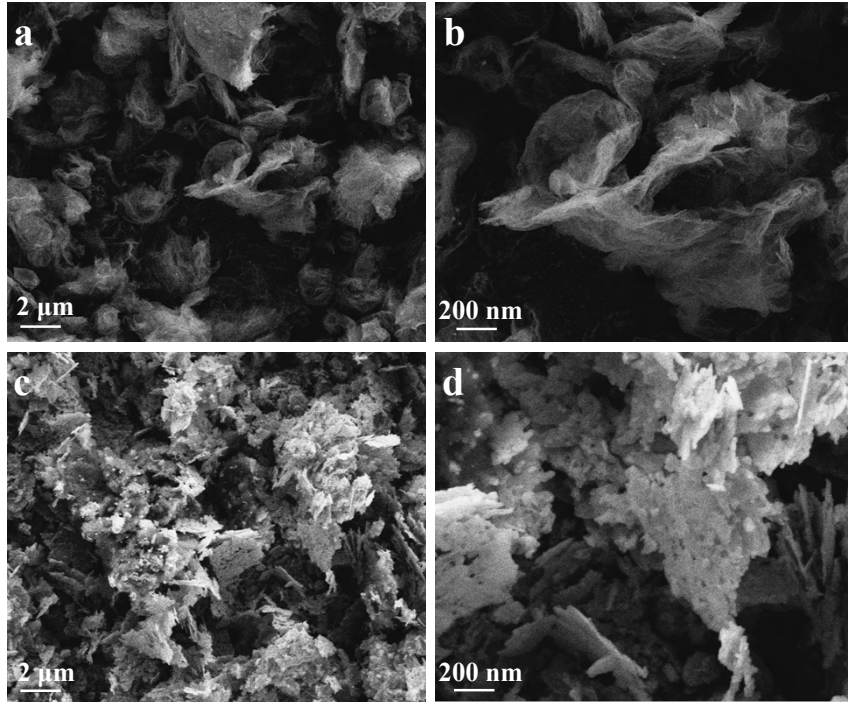

Figure S1. SEM of Gr (a,b), Gr/ZnO (c,d) samples.

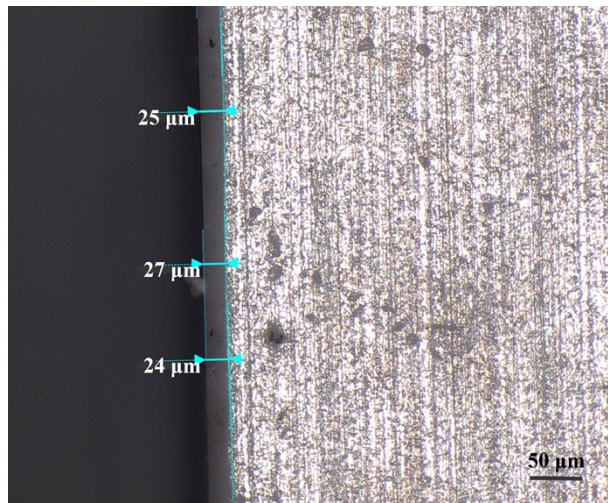

Figure S2. Optical microscope of Gr<sub>0.04</sub>-ZnO<sub>0.4</sub> samples.

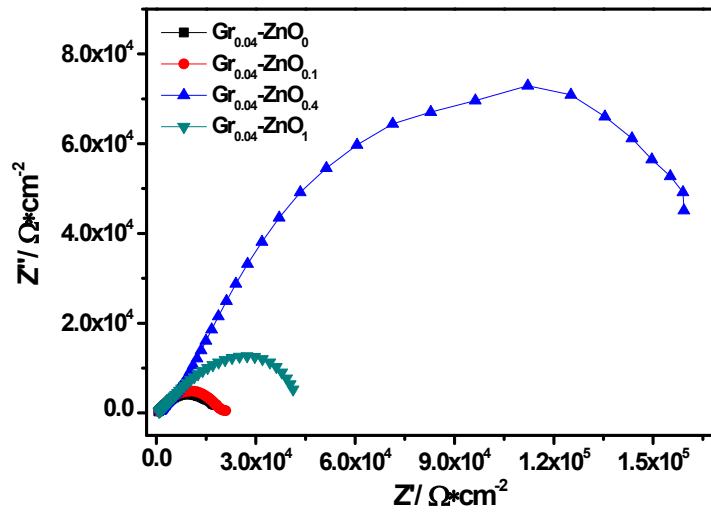

Figure S3. The Nyquist plots of  $\text{Gr}_{0.04}\text{-ZnO}_0$ ,  $\text{Gr}_{0.04}\text{-ZnO}_{0.1}$ ,  $\text{Gr}_{0.04}\text{-ZnO}_{0.4}$  and  $\text{Gr}_{0.04}\text{-ZnO}_1$ .

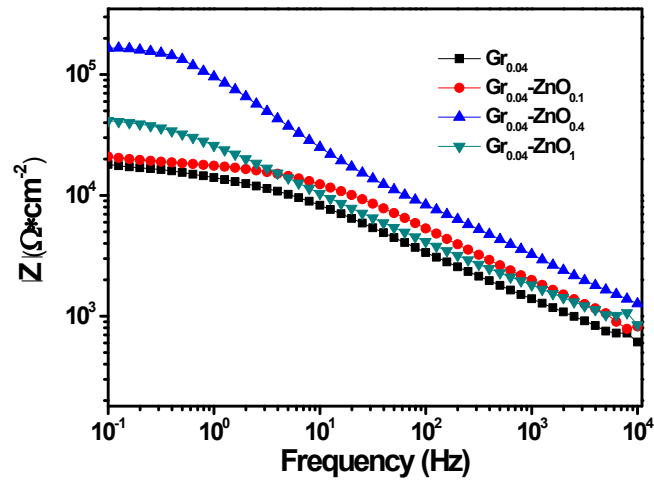

Figure S4. The Bode modulus plots of  $\text{Gr}_{0.04}\text{-ZnO}_0$ ,  $\text{Gr}_{0.04}\text{-ZnO}_{0.1}$ ,  $\text{Gr}_{0.04}\text{-ZnO}_{0.4}$  and  $\text{Gr}_{0.04}\text{-ZnO}_1$ .

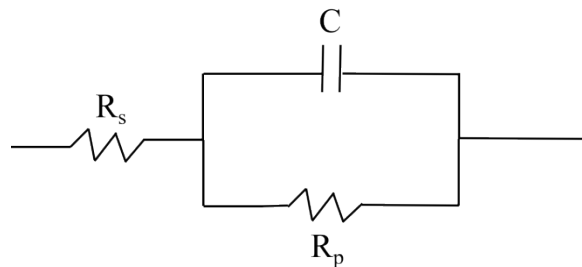

Figure S5. Equivalent electric circuits of the collected EIS results.

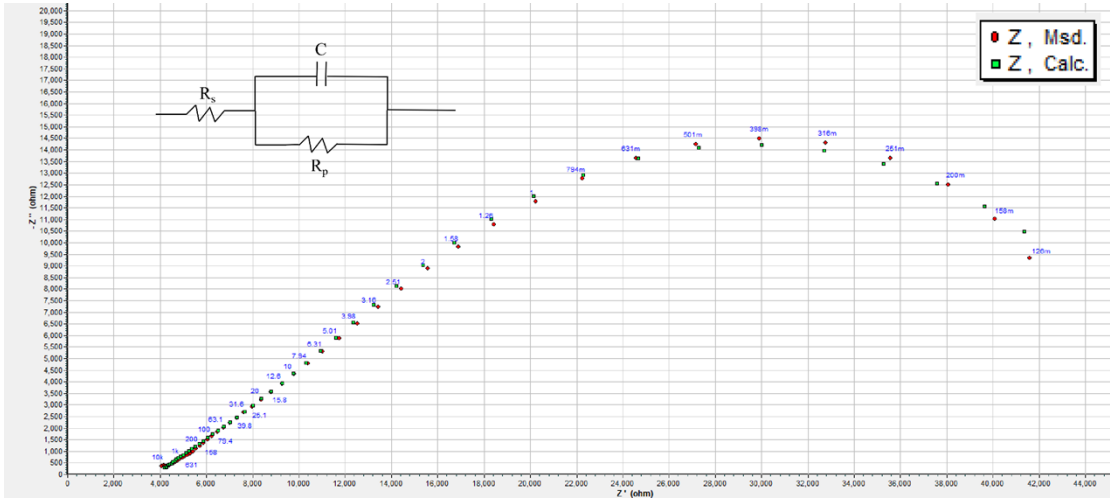

Figure S6. A typical Nyquist plots of  $\text{Gr}_{0.02}\text{-ZnO}_{0.4}$  sample demonstrating the fitted and experimental data by ZSimpWin software.

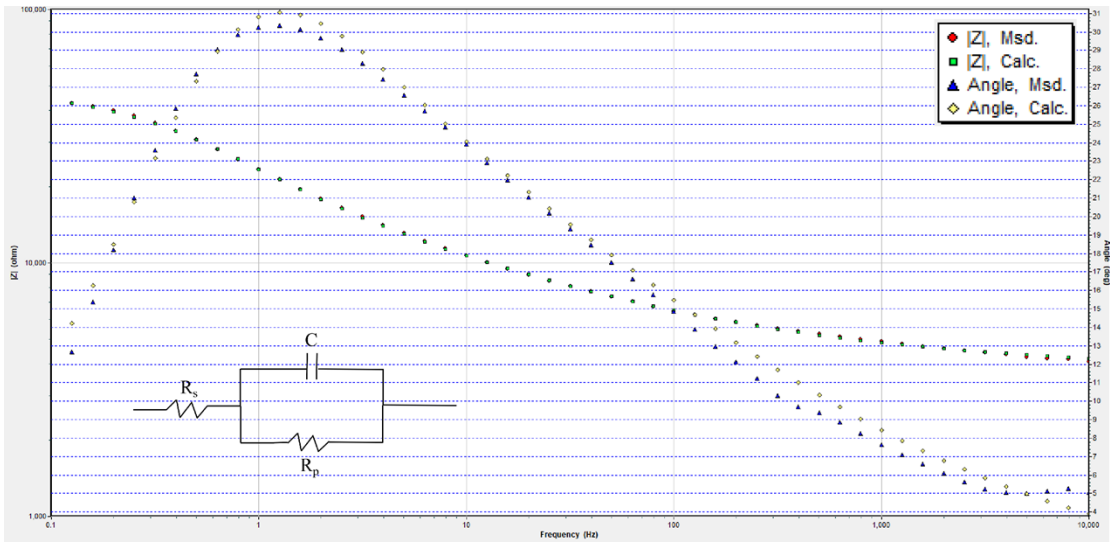

Figure S7. A typical Bode modulus plots of  $\text{Gr}_{0.02}\text{-ZnO}_{0.4}$  sample demonstrating the fitted and experimental data by ZSimpWin software.

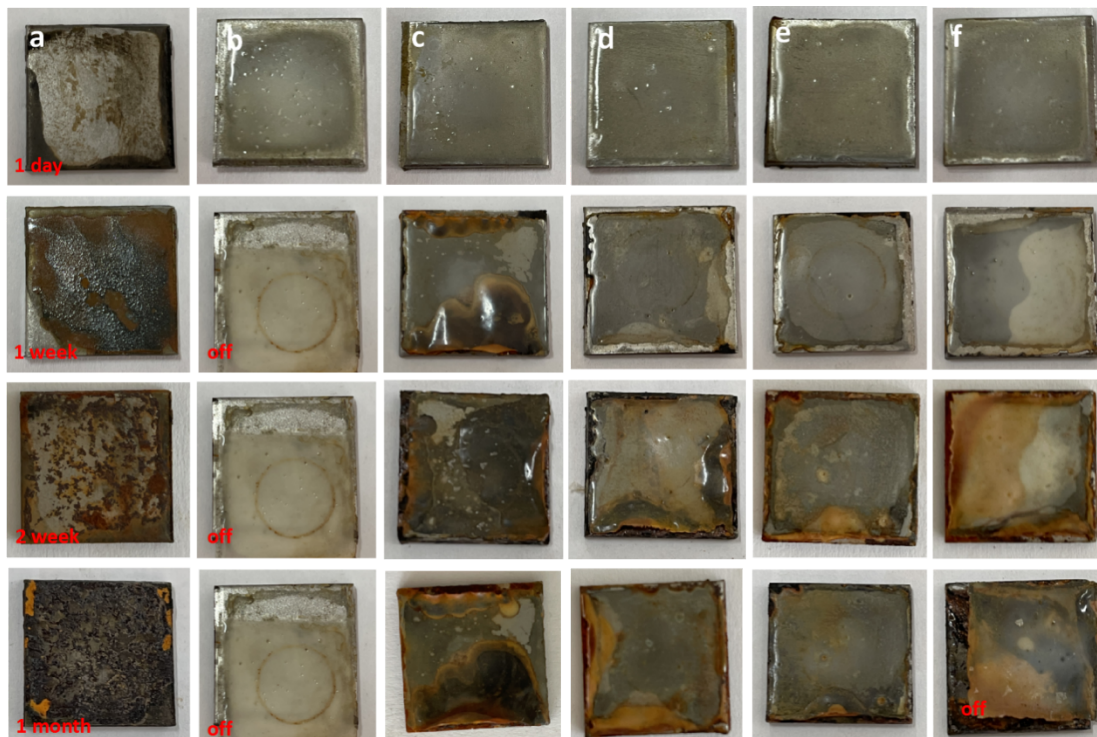

Figure S8. The photograph of bare Q235,  $\text{Gr}_0\text{-ZnO}_0$ ,  $\text{Gr}_{0.04}\text{-ZnO}_0$ ,  $\text{Gr}_{0.02}\text{-ZnO}_{0.4}$ ,  $\text{Gr}_{0.04}\text{-ZnO}_{0.4}$  and  $\text{Gr}_{0.06}\text{-ZnO}_{0.4}$  were immersed in 50 mL 3.5wt% NaCl for accelerated corrosion test at different days.

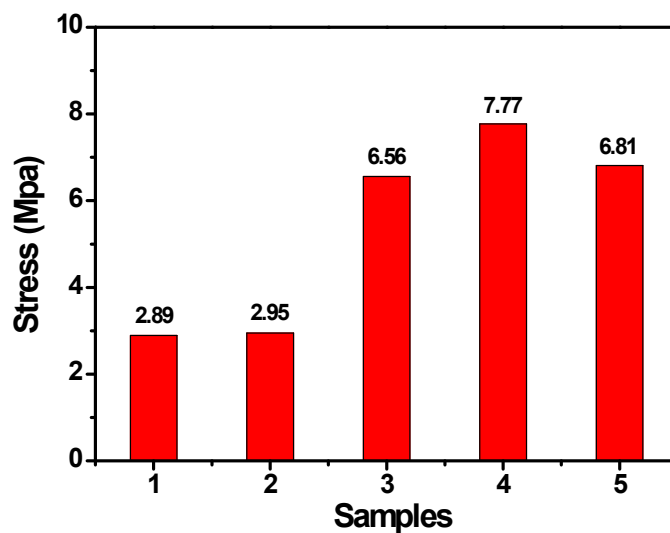

Figure S9. The interfacial bonding strength of  $\text{Gr}_0\text{-ZnO}_0$ ,  $\text{Gr}_{0.04}\text{-ZnO}_0$ ,  $\text{Gr}_{0.04}\text{-ZnO}_{0.1}$ ,  $\text{Gr}_{0.04}\text{-ZnO}_{0.4}$  and  $\text{Gr}_{0.04}\text{-ZnO}_1$ . Sample of 1, 2, 3, 4 and 5 are represent for  $\text{Gr}_0\text{-ZnO}_0$ ,  $\text{Gr}_{0.04}\text{-ZnO}_0$ ,  $\text{Gr}_{0.04}\text{-ZnO}_{0.1}$ ,  $\text{Gr}_{0.04}\text{-ZnO}_{0.4}$  and  $\text{Gr}_{0.04}\text{-ZnO}_1$ , respectively.

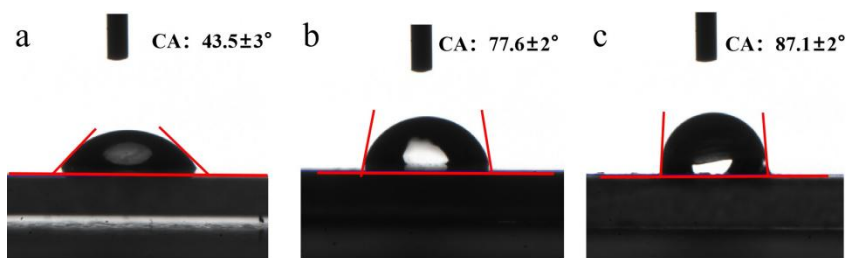

Figure S10. Water contact angle pictures of (a)  $\text{Gr}_0\text{-ZnO}_0$ , (b)  $\text{Gr}_{0.04}\text{-ZnO}_0$  and (c)  $\text{Gr}_{0.04}\text{-ZnO}_{0.4}$ .
